# Supplementary material for: The protective role of GATA6+ pericardial macrophages in pericardial inflammation
Source: PubMed Central journal article supplement — iScience. 2024 Jun 13;27(7):110244. doi: 10.1016/j.isci.2024.110244 (PMC11260870; doi:10.1016/j.isci.2024.110244), 2024-06-13
Supplement: mmc1.pdf [file mmc1.pdf]

**Supplemental information**

**The protective role of GATA6<sup>+</sup> pericardial  
macrophages in pericardial inflammation**

**David M. Hughes, Taejoon Won, Monica V. Talor, Hannah M. Kalinoski, Ivana Jurčová, Ondrej Szárszoi, Ilja Stríž, Lenka Čurnová, William Bracamonte-Baran, Vojtěch Melenovský, and Daniela Čiháková**

**Supplemental Table 1. Antibodies for Flow Cytometry**

| <b>Antibody Target</b> | <b>Fluorochrome</b>  | <b>Clone</b>  | <b>Source</b>                | <b>Category Number</b>              | <b>Dilution</b> |
|------------------------|----------------------|---------------|------------------------------|-------------------------------------|-----------------|
| <b>MOUSE</b>           |                      |               |                              |                                     |                 |
| I-A/I-E (MHCII)        | Alexa Fluor 700      | M5/114        | Biolegend                    | 107622;<br>RRID: AB_493727          | 1:100           |
| Ly-6C                  | Brilliant Violet 785 | HK1.4         | Biolegend                    | 128041;<br>RRID: AB_2565852         | 1:100           |
| CD64 (FcγR1)           | Brilliant Violet 711 | X54-5/7.1     | Biolegend                    | 139311;<br>RRID: AB_2563846         | 1:100           |
| CD192 (CCR2)           | Brilliant Violet 421 | SA203G11      | Biolegend                    | 150605;<br>RRID: AB_2571913         | 1:100           |
| CD31                   | APC                  | MEC13.3       | Biolegend                    | 102510;<br>RRID: AB_312917          | 1:100           |
| CD11b                  | APC-eFluor780        | M1/70         | Invitrogen                   | 47-0112-82;<br>RRID: AB_1603193     | 1:100           |
| CD19                   | PE-Cyanine5.5        | eBio1D3 (1D3) | Invitrogen                   | 35-0793-82;<br>RRID: AB_891395      | 1:100           |
| CD29                   | PE/Cyanine7          | HMβ1-1        | Biolegend                    | 102221;<br>RRID: AB_528789          | 1:100           |
| CD45                   | PE-Texas Red         | 30-F11        | ThermoFisher                 | MCD4517;<br>RRID:<br>AB_10392557    | 1:100           |
| SiglecF                | PE                   | E50-2440      | BD<br>Biosciences            | 552126;<br>RRID:AB_394341           | 1:100           |
| TCRγδ                  | PerCP/Cyanine5.5     | GL3           | Biolegend                    | 118118;<br>RRID:<br>AB_10612756     | 1:100           |
| Ly-6A/E (Sca-1)        | PerCP                | D7            | Biolegend                    | 108122;<br>RRID: AB_893614          | 1:100           |
| CD3                    | Alexa Fluor 532      | 17A2          | Invitrogen                   | 58-0032-82;<br>RRID:<br>AB_11217479 | 1:100           |
| α-SMA                  | Alexa Fluor 488      | 1A4           | Invitrogen                   | 53-9760-82;<br>RRID: AB_2574461     | 1:50            |
| CD140a<br>(PDGFRα)     | Brilliant Violet 750 | APA5          | BD<br>Biosciences            | 747220;<br>RRID: AB_2871943         | 1:100           |
| CD8a                   | Brilliant Violet 650 | 53-6.7        | Biolegend                    | 100742;<br>RRID: AB_2563056         | 1:100           |
| CD4                    | Brilliant Violet 605 | RM4-5         | Biolegend                    | 100548;<br>RRID: AB_2563054         | 1:100           |
| Ly-6G                  | Pacific Blue         | 1A8           | Biolegend                    | 127612;<br>RRID: AB_2251161         | 1:100           |
| <b>HUMAN</b>           |                      |               |                              |                                     |                 |
| GATA6*                 | PE                   | D61E4         | Cell Signaling<br>Technology | 26452S;<br>RRID: AB_2798924         | 1:100           |

\*GATA6 antibody is cross-reactive with mouse
